# Supplementary material for: What controls the tail behaviour of flood series: Rainfall or runoff generation?
Source: Copernicus journal article supplement (doi:10.5194/hess-2023-186), 2023-07-31

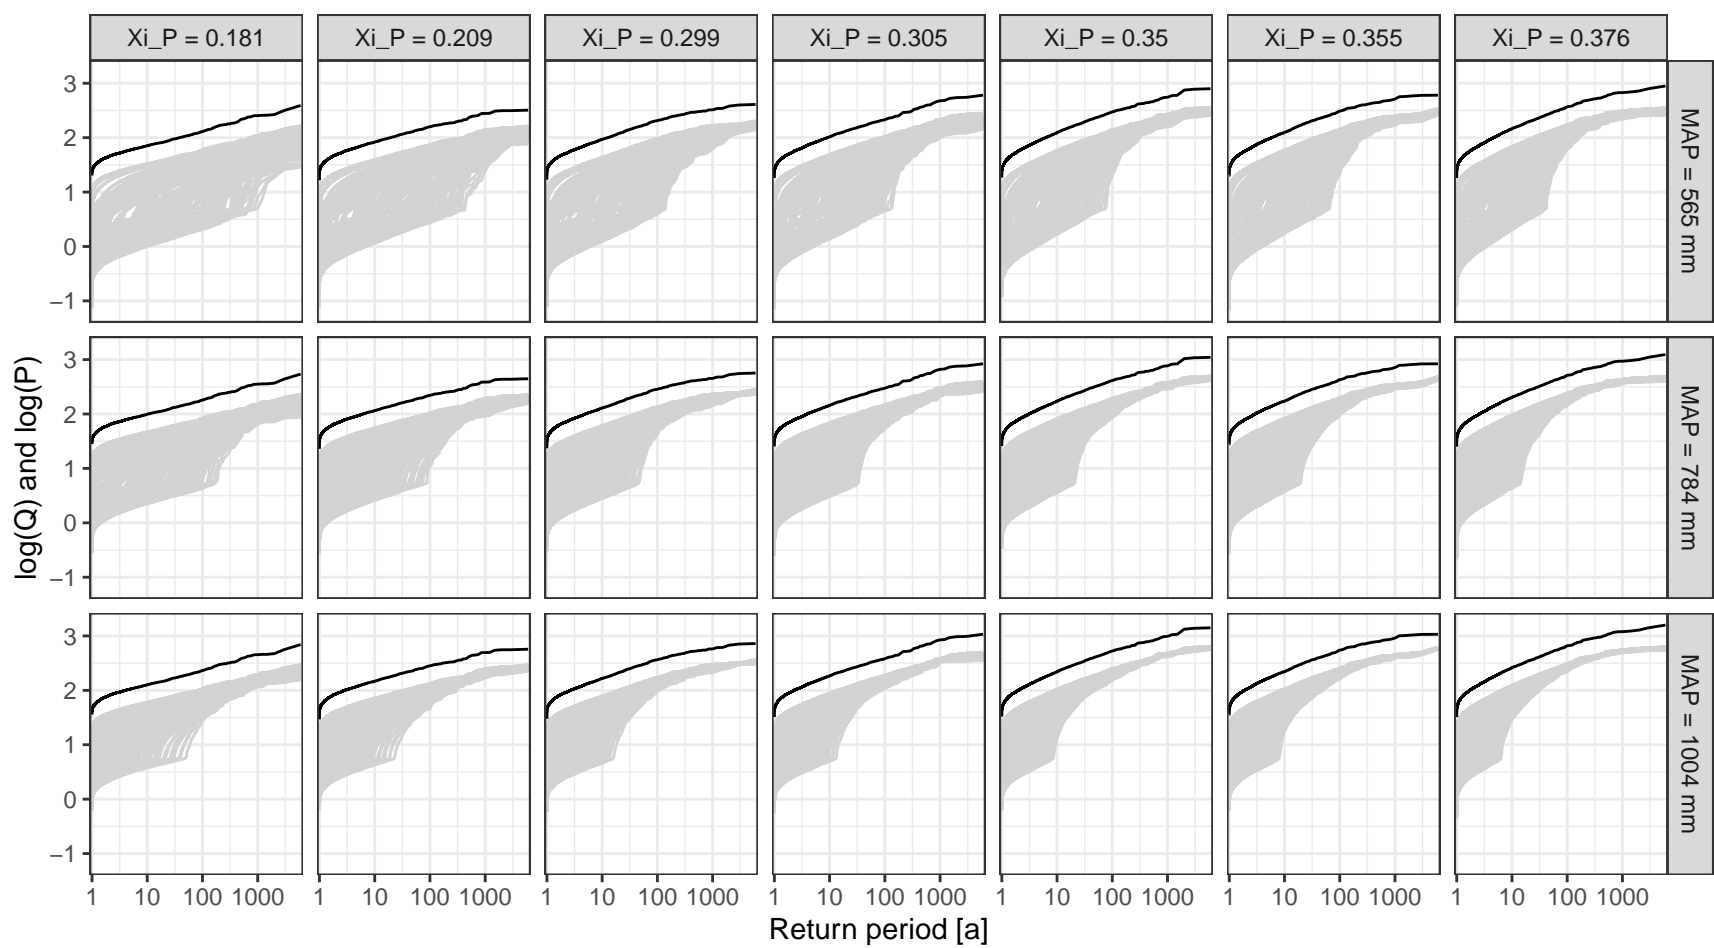

Supplement: Supplementary file [file hess-2023-186-AC1-supplement.pdf]
